# Supplementary figures and images for: Brain Metastasis Incidence and Patterns of Presentation After Definitive Treatment of Locally Advanced Non-Small Cell Lung Cancer: A Potential Argument for Brain Magnetic Resonance Imaging Surveillance
Source: PubMed Central journal article supplement — Adv Radiat Oncol. 2022 Oct 23;8(3):101058. doi: 10.1016/j.adro.2022.101058 (PMC10238260; doi:10.1016/j.adro.2022.101058), 2022-10-23

Supplemental Figure 1: Upfront management based on burden of brain disease.

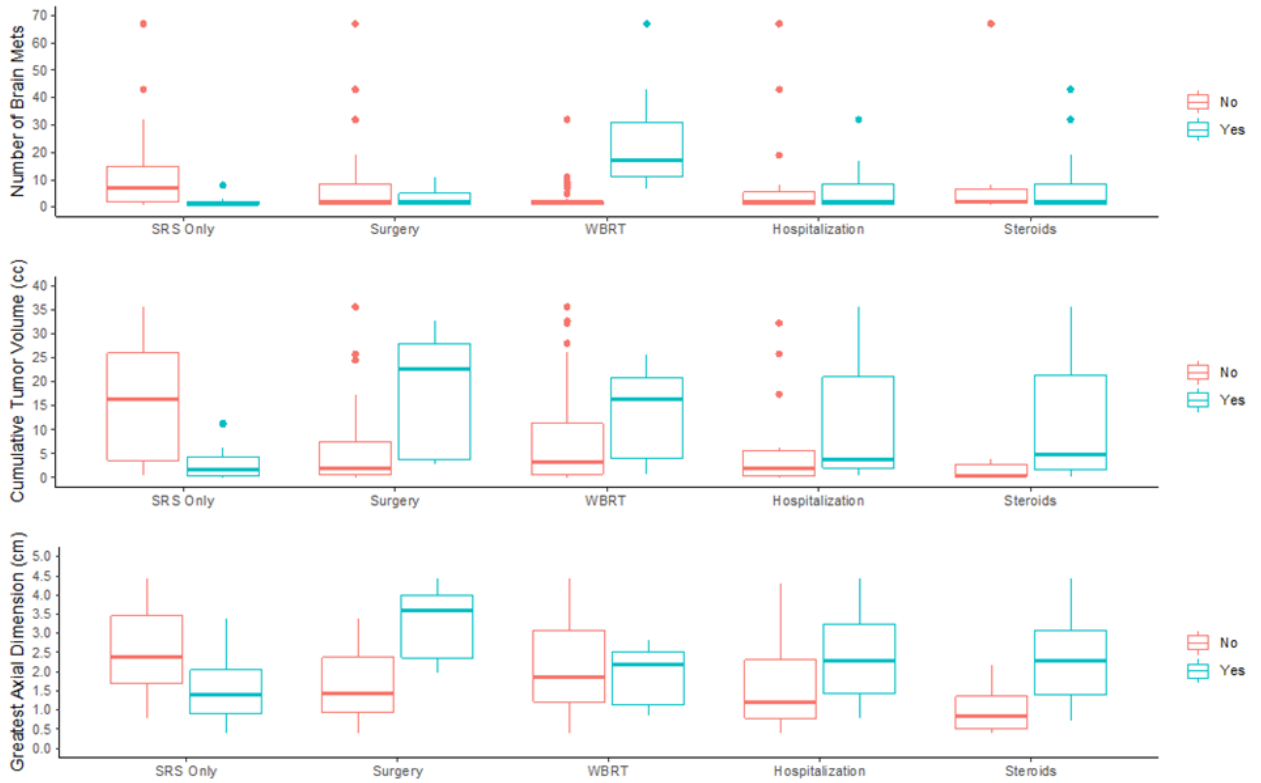

Supplement: mmc5.pdf [file mmc5.pdf]
